# Supplementary material for: Analysis of Primary Chronic Lymphocytic Leukemia Cells’ Signaling Pathways
Source: MDPI journal article supplement (doi:10.3390/biomedicines12030524), 2024-02-26
Supplement: s1 [file s1]

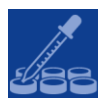

## Supplementary Materials:

**Supplementary Table S1.** Clinical stage, age, sex and laboratory characteristics of patients (nos. 1–20) diagnosed with CLL according to the WHO classification. The patient score according to the Rai, Binet and TTM classification was reported. Samples for gene and protein analysis were taken at patients' first visit, before the start of treatment. TTM = total tumor mass. M = male, F = female,

| CLL | AGE | SEX | LEUKOCYTES<br>( $\times 10^9/L$ ) | LYMPHOCYTES<br>( $\times 10^9/L$ ) | NEUTROPHILS<br>( $\times 10^9/L$ ) | HEMOGLOBIN<br>(G/L) | THROMBOCYTE<br>S | TTM | BINET | RAI |
|-----|-----|-----|-----------------------------------|------------------------------------|------------------------------------|---------------------|------------------|-----|-------|-----|
| 1   | 63  | F   | 70                                | 54                                 | 5                                  | 133                 | 198              | 8   | A     | 0   |
| 2   | 70  | M   | 46                                | 42                                 | 4                                  | 111                 | 491              | 16  | B     | III |
| 3   | 54  | M   | 645                               | 612                                | 13                                 | 73                  | 43               | 55  | C     | IV  |
| 4   | 66  | F   | 239                               | 227                                | 7                                  | 67                  | 171              | 20  | C     | III |
| 5   | 69  | F   | 77                                | 59                                 | 5                                  | 96                  | 85               | 14  | C     | IV  |
| 6   | 45  | M   | 250                               | 242                                | 2                                  | 106                 | 152              | 22  | B     | III |
| 7   | 58  | F   | 19                                | 16                                 | 2                                  | 130                 | 185              | 6   | B     | I   |
| 8   | 65  | M   | 15                                | 12                                 | 2                                  | 140                 | 128              | 15  | B     | II  |
| 9   | 74  | F   | 11                                | 5                                  | 5                                  | 127                 | 304              | 2   | A     | 0   |
| 10  | 65  | M   | 56                                | 49                                 | 5                                  | 121                 | 166              | 15  | B     | II  |
| 11  | 67  | M   | 19                                | 13                                 | 5                                  | 160                 | 228              | 6   | A     | I   |
| 12  | 65  | M   | 20                                | 13                                 | 4                                  | 112                 | 159              | 22  | B     | II  |
| 13  | 77  | F   | 66                                | 59                                 | 7                                  | 146                 | 163              | 12  | A     | II  |
| 14  | 72  | M   | 85                                | 78                                 | 2                                  | 124                 | 119              | 12  | A     | II  |
| 15  | 63  | F   | 56                                | 46                                 | 8                                  | 117                 | 92               | 13  | C     | IV  |
| 16  | 50  | F   | 64                                | 59                                 | 4                                  | 138                 | 217              | 9   | A     | I   |
| 17  | 75  | F   | 107                               | 99                                 | 5                                  | 133                 | 183              | 9   | A     | I   |
| 18  | 66  | M   | 23                                | 20                                 | 1                                  | 92                  | 98               | 6   | C     | IV  |
| 19  | 75  | M   | 92                                | 83                                 | 8                                  | 81                  | 262              | 14  | C     | III |
| 20  | 37  | M   | 15                                | 11                                 | 4                                  | 149                 | 209              | 6   | A     | I   |

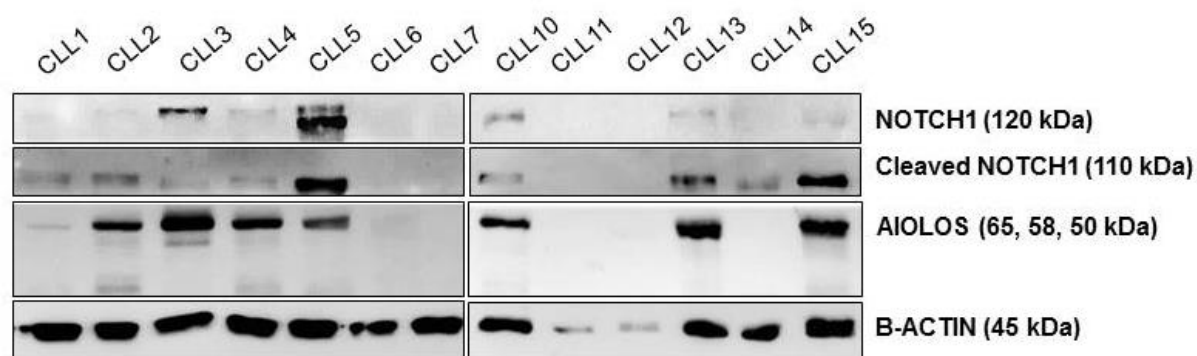

**Supplementary Figure S1.** Western blot analysis of B-CLL samples. Proteins were isolated from 13 CLL samples and analyzed for expression of NOTCH1, cleaved NOTCH1, AIOLOS and  $\beta$ -ACTIN using corresponding antibodies.
